# Supplementary material for: Swimming performance of Bradyrhizobium diazoefficiens is an emergent property of its two flagellar systems
Source: PubMed Central journal article supplement (PMC4823718; doi:10.1038/srep23841), 2016-04-07
Supplement: srep23841-s1.pdf [file srep23841-s1.pdf]

1 **Swimming performance of *Bradyrhizobium diazoefficiens* is an**  
2 **emergent property of its two flagellar systems**

3  
4 **Supplementary Information**

5  
6 J. Ignacio Quelas<sup>a</sup>, M. Julia Althabegoiti<sup>a</sup>, Celia Jimenez-Sanchez<sup>a,b</sup>, Augusto A. Melgarejo<sup>c</sup>,  
7 Verónica I. Marconi<sup>d</sup>, Elías J. Mongiardini<sup>a</sup>, Sebastián A. Trejo<sup>e,f</sup>, Florencia Mengucci<sup>a</sup>,  
8 José-Julio Ortega-Calvo<sup>b</sup>, Aníbal R. Lodeiro<sup>a\*</sup>

9  
10 <sup>a</sup>Instituto de Biotecnología y Biología Molecular (IBBM)-Facultad de Ciencias Exactas,  
11 UNLP-CONICET (Argentina), <sup>b</sup>Instituto de Recursos Naturales y Agrobiología de Sevilla  
12 (IRNAS)-CSIC (Spain), <sup>c</sup>Departamento de Ciencias Básicas, Facultad de Ingeniería, UNLP  
13 (Argentina), <sup>d</sup>Facultad de Matemáticas, Astronomía y Física (FAMAF)-UNC e IFEG-  
14 CONICET (Argentina), <sup>e</sup>Servei de Proteòmica i Biologia Estructural, Universitat Autònoma  
15 de Barcelona, Bellaterra (Spain). <sup>f</sup>Present address: Instituto Multidisciplinario de Biología  
16 Celular (IMBICE), CONICET (Argentina).

17

18

19

20 **Matrix-assisted laser desorption ionization time-of-flight (MALDI-TOF) analysis of**  
21 **subpolar and lateral flagellins.** Polypeptide samples were taken from single bands of  
22 denaturing polyacrylamide gel (SDS-PAGE) separations of subpolar and lateral flagellin  
23 subunits. These bands were trypsin-digested and analyzed essentially as described<sup>60</sup>. For  
24 MALDI-TOF target preparation, each sample was spotted onto a MALDI target plate (MTP)  
25 384 GroundSteel plate (Bruker Daltonik, Bremen, Germany) using a standard dried droplet  
26 method. Profile analyses were performed on an UltrafleXtreme MALDI TOF/TOF  
27 spectrometer with FlexControl 3.4 (Bruker Daltonik, Bremen, Germany) data acquisition  
28 software. Mass spectra were acquired in reflector mode geometry using the following  
29 settings: 600-5000 Da mass range, positive mode, and ion suppression up to 800 m/z. Mass  
30 calibration was performed using the Peptide Calibration Standard (Bruker Daltonik,  
31 Bremen, Germany).

32 LafA1 and LafA2 (Bll6866 and Bll6865, respectively) were unambiguously  
33 identified from the SDS-PAGE low-molecular-weight band by peptide mass fingerprint  
34 MALDI TOF mass spectrometry (MS) using the MASCOT tools search. Similarly, only  
35 some FliC proteins were identified from the SDS-PAGE high-molecular-weight band. A  
36 further analysis that was carried out by sequencing MALDI TOF-TOF MS (Supplementary  
37 Table S1) allowed a clear identification of specific tryptic peptides from each flagellin  
38 (FliC1, FliC2, FliC3 and FliC4). The obtained chromatograms are shown in Supplementary  
39 Fig. S1, and the specific peptides sequenced are resumed in Supplementary Table S2.  
40 Therefore, all of the polypeptides that were encoded in bll6865-bll6866 and bll5843-bll5846  
41 were identified in our *B. diazoefficiens* flagellin samples.

42

43 Table S1. Peptides identified in theoretical tryptic digestion of flagellins\*.

|                                                                         | Meas M/z | Calc MH+ | Dev.(Da) | Range     | Sequence                               |
|-------------------------------------------------------------------------|----------|----------|----------|-----------|----------------------------------------|
| <b>637373431 NP_772483</b><br><b>[B. japonicum USDA 110: NC_004463]</b> |          |          |          |           |                                        |
| peak 40                                                                 | 2454,40  | 2454,37  | 0.034    | 741 - 763 | QSIAVSALSANQSQSVLQLLR                  |
| peak 17                                                                 | 1681,95  | 1681,88  | 0.070    | 93 - 108  | SIANQALQTTVGYSTK                       |
| peak 38                                                                 | 2336,20  | 2336,16  | 0.041    | 36 - 56   | KVNTALDNPTNFFTAQGLDNR                  |
| peak 29                                                                 | 2208,10  | 2208,07  | 0.035    | 37 - 56   | VNTALDNPTNFFTAQGLDNR                   |
| peak 11                                                                 | 1616,92  | 1616,86  | 0.061    | 689 - 704 | SEGSALGSNLSIVQVR                       |
| peak 28                                                                 | 2102,15  | 2102,11  | 0.038    | 12 - 30   | QNLLSLQSTADLLATTQER                    |
| peak 46                                                                 | 2632,30  | 2632,29  | 0.008    | 501 - 526 | TLTFTSFNGGTPVNVTFDGDGTNGTVK            |
| peak 49                                                                 | 2734,43  | 2734,39  | 0.035    | 347 - 373 | STTAGSLGTLVQDGSSTLNIDGHTITFK           |
| peak 63                                                                 | 3746,28  | 3746,01  | 0.271    | 1 - 35    | MSNIVLSASVRQNLLSLQSTADLLATTQERLSTGK    |
| <b>637373432 NP_772484</b><br><b>[B. japonicum USDA 110: NC_004463]</b> |          |          |          |           |                                        |
| peak 35                                                                 | 2311,14  | 2311,10  | 0.041    | 36 - 56   | SVNSALDNPTNFFTAQSLDNR                  |
| peak 27                                                                 | 2087,15  | 2087,11  | 0.045    | 12 - 30   | QNLLSLQSTADLLATTQNR                    |
| peak 40                                                                 | 2454,40  | 2454,37  | 0.034    | 735 - 757 | QSIAVSALSANQSQSVLQLLR                  |
| peak 47                                                                 | 2647,39  | 2647,36  | 0.029    | 337 - 363 | TTSAASLGATIADGSTLNVDGHHVITFK           |
| peak 32                                                                 | 2273,20  | 2273,17  | 0.038    | 628 - 648 | LVFDETGKSSLNITGVTYNSK                  |
| peak 17                                                                 | 1681,95  | 1681,88  | 0.070    | 93 - 108  | SIANQALQTTVGYSTK                       |
| peak 14                                                                 | 1646,95  | 1646,87  | 0.078    | 683 - 698 | SEASSLGSNLSVVQIR                       |
| peak 5                                                                  | 1359,81  | 1359,76  | 0.046    | 670 - 682 | VLTNLNAASSTLR                          |
| peak 22                                                                 | 1817,05  | 1816,95  | 0.103    | 318 - 336 | ALGLTTSTGAGNATVNVNR                    |
| peak 50                                                                 | 2915,61  | 2915,57  | 0.046    | 268 - 300 | TVSISGAATIIVSASQPGAIVSTAAAGAVTLK       |
| peak 42                                                                 | 2573,40  | 2573,39  | 0.007    | 12 - 35   | QNLLSLQSTADLLATTQNRSLSTGK              |
| peak 1                                                                  | 932,56   | 932,51   | 0.056    | 521 - 528 | TLDQLNTK                               |
| peak 7                                                                  | 1383,73  | 1383,71  | 0.015    | 636 - 648 | SSLNITGVTYNSK                          |
| <b>637373433 NP_772485</b><br><b>[B. japonicum USDA 110: NC_004463]</b> |          |          |          |           |                                        |
| peak 35                                                                 | 2311,14  | 2311,10  | 0.041    | 36 - 56   | SVNSALDNPTNFFTAQSLDNR                  |
| peak 21                                                                 | 1785,04  | 1784,96  | 0.077    | 318 - 336 | ALGLTTAVGGGNATVNVNR                    |
| peak 40                                                                 | 2454,40  | 2454,37  | 0.034    | 735 - 757 | QSIAVSALSANQSQSVLQLLR                  |
| peak 47                                                                 | 2647,39  | 2647,36  | 0.029    | 337 - 363 | TTSAASLGATIADGSTLNVDGHHVITFK           |
| peak 32                                                                 | 2273,20  | 2273,17  | 0.038    | 628 - 648 | LVFDETGKSNLSITGVTYNSK                  |
| peak 17                                                                 | 1681,95  | 1681,88  | 0.070    | 93 - 108  | SIANQALQTTVGYSTK                       |
| peak 25                                                                 | 2060,14  | 2060,10  | 0.042    | 12 - 30   | QNLLSLQSTADLLATTQSR                    |
| peak 15                                                                 | 1660,97  | 1660,89  | 0.082    | 683 - 698 | SEASSLGSNLTIVQVR                       |
| peak 43                                                                 | 2576,29  | 2576,26  | 0.025    | 495 - 520 | TLTFASFNGGTAIVNVTFDGDGTNGTVK           |
| peak 34                                                                 | 2293,16  | 2293,18  | -0.022   | 683 - 703 | SEASSLGSNLTIVQVRQDFNK                  |
| peak 6                                                                  | 1375,80  | 1375,75  | 0.050    | 670 - 682 | VLTNLNSASSTLR                          |
| peak 57                                                                 | 3374,92  | 3374,79  | 0.128    | 649 - 682 | GLGLAALTGGVDFIDNAATNKVLTNLNSASSTLR     |
| peak 62                                                                 | 3492,98  | 3492,79  | 0.185    | 448 - 484 | LSTGVNADLSVTGTGNALNVLGLAGNTGTSTAFTAAR  |
| peak 23                                                                 | 2018,11  | 2018,06  | 0.052    | 649 - 669 | GLGLAALTGGVDFIDNAATNK                  |
| peak 52                                                                 | 3038,66  | 3038,61  | 0.050    | 57 - 86   | ASDINNLLDGIANGVQVLQAANTGITSLQK         |
| peak 36                                                                 | 2325,34  | 2325,29  | 0.050    | 313 - 336 | ADLLKALGLTTAVGGGNATVNVNR               |
| peak 60                                                                 | 3428,99  | 3428,83  | 0.153    | 301 - 336 | SSTGADLSVTGKADLLKALGLTTAVGGGNATVNVNR   |
| peak 9                                                                  | 1563,89  | 1563,80  | 0.088    | 109 - 124 | SNVSTTISGATAADLR                       |
| peak 50                                                                 | 2915,61  | 2915,57  | 0.046    | 268 - 300 | TVSISGAATIIVSASQPGAIVSTAAAGAVTLK       |
| peak 61                                                                 | 3433,88  | 3433,72  | 0.153    | 485 - 520 | TSGVGGITGKTLTFASFNGGTAIVNVTFDGDGTNGTVK |
| peak 41                                                                 | 2546,25  | 2546,38  | 0.127    | 12 - 35   | QNLLSLQSTADLLATTQSRSLSTGK              |
| peak 1                                                                  | 932,56   | 932,51   | 0.056    | 521 - 528 | TLDQLNTK                               |
| peak 7                                                                  | 1383,73  | 1383,71  | 0.015    | 636 - 648 | SNLSITGVTYNSK                          |
| peak 63                                                                 | 3746,28  | 3745,92  | 0.362    | 409 - 447 | AIDLATGVQATINANGTATLATATGQTNSINASGQLK  |

| 637373434 NP_772486<br>[B. japonicum USDA 110:<br>NC_004463] |         |         |       |           |                                         |
|--------------------------------------------------------------|---------|---------|-------|-----------|-----------------------------------------|
| peak 35                                                      | 2311,14 | 2311,10 | 0.041 | 36 - 56   | SVNSALDNPTNFFTAQSLDNR                   |
| peak 21                                                      | 1785,04 | 1784,96 | 0.077 | 318 - 336 | ALGLTTAVGGGNATVNVNR                     |
| peak 31                                                      | 2265,18 | 2265,15 | 0.034 | 683 - 703 | SEASSLGSNLSVVQVRQDFNK                   |
| peak 27                                                      | 2087,15 | 2087,11 | 0.045 | 12 - 30   | QNLLSLQSTADLLATTQNR                     |
| peak 40                                                      | 2454,40 | 2454,37 | 0.034 | 735 - 757 | QSIAVSALSANQSQSVLQLLR                   |
| peak 47                                                      | 2647,39 | 2647,36 | 0.029 | 337 - 363 | TTSAASLGATIADGSTLNVDGHVITFK             |
| peak 13                                                      | 1632,94 | 1632,86 | 0.081 | 683 - 698 | SEASSLGSNLSVVQVR                        |
| peak 4                                                       | 1345,79 | 1345,74 | 0.049 | 670 - 682 | VLSNLNAASSTLR                           |
| peak 32                                                      | 2273,20 | 2273,17 | 0.038 | 628 - 648 | LVFDETGKSNLSITGVTYNSK                   |
| peak 17                                                      | 1681,95 | 1681,88 | 0.070 | 93 - 108  | SIANQALQTTVGYSTK                        |
| peak 43                                                      | 2576,29 | 2576,26 | 0.025 | 495 - 520 | TLTFASFNGGTAVNVTFDGDGTNGTVK             |
| peak 24                                                      | 2048,12 | 2048,07 | 0.054 | 649 - 669 | GLGLAALTSGVDFIDNAATNK                   |
| peak 57                                                      | 3374,92 | 3374,79 | 0.128 | 649 - 682 | GLGLAALTSGVDFIDNAATNKVLSNLNAASSTLR      |
| peak 62                                                      | 3492,98 | 3492,79 | 0.185 | 448 - 484 | LSTGVNADLSVTGTGNALNVLGLAGNTGTSTAFTAAR   |
| peak 52                                                      | 3038,66 | 3038,61 | 0.050 | 57 - 86   | ASDINNLLDGIANGVQVLQAANTGITSLQK          |
| peak 36                                                      | 2325,34 | 2325,29 | 0.050 | 313 - 336 | ADLLKALGLTTAVGGGNATVNVNR                |
| peak 8                                                       | 1533,86 | 1533,79 | 0.076 | 109 - 124 | SNVSATISGATAADLR                        |
| peak 60                                                      | 3428,99 | 3428,83 | 0.153 | 301 - 336 | SSTGADLSVTGKADLLKALGLTTAVGGGNATVNVNR    |
| peak 51                                                      | 2959,61 | 2959,58 | 0.028 | 670 - 698 | VLSNLNAASSTLRSEASSLGSNLSVVQVR           |
| peak 50                                                      | 2915,61 | 2915,57 | 0.046 | 268 - 300 | TVSISGAATIIVSASQPGAASVSTAAAGAVTLK       |
| peak 61                                                      | 3433,88 | 3433,72 | 0.153 | 485 - 520 | TSGVGGITGKTLTFASFNGGTAVNVTFDGDGTNGTVK   |
| peak 42                                                      | 2573,40 | 2573,39 | 0.007 | 12 - 35   | QNLLSLQSTADLLATTQNRSLTGK                |
| peak 55                                                      | 3190,69 | 3190,62 | 0.072 | 704 - 734 | SLINVLTGTGSSNLTADTNTTEAANSQALSTR        |
| peak 1                                                       | 932,56  | 932,51  | 0.056 | 521 - 528 | TLDQLNTK                                |
| peak 7                                                       | 1383,73 | 1383,71 | 0.015 | 636 - 648 | SNLSITGVTYNSK                           |
| peak 64                                                      | 3746,28 | 3745,92 | 0.362 | 409 - 447 | AIDLATGVQTATINANGTATLATATGQTNSSINASGQLK |
| peak 66                                                      | 3824,33 | 3824,00 | 0.328 | 87 - 124  | LIDSAKSIANQALQTTVGYSTKSNVSATISGATAADLR  |
| peak 65                                                      | 3823,25 | 3822,91 | 0.343 | 699 - 734 | QDFNKSLINVLTGTGSSNLTADTNTTEAANSQALSTR   |
| peak 63                                                      | 3592,05 | 3591,87 | 0.179 | 670 - 703 | VLSNLNAASSTLRSEASSLGSNLSVVQVRQDFNK      |

44

45 \*All matches between spectrum mass peak and theoretical tryptic digest peptides of each  
46 flagellin are shown. Grey rows: specific peptides from each flagellin. Specific peptide  
47 corresponds to sequences present only in one flagellin but not in the others.

48

49

50 **637373431 NP\_772483:**51 **Peak 28**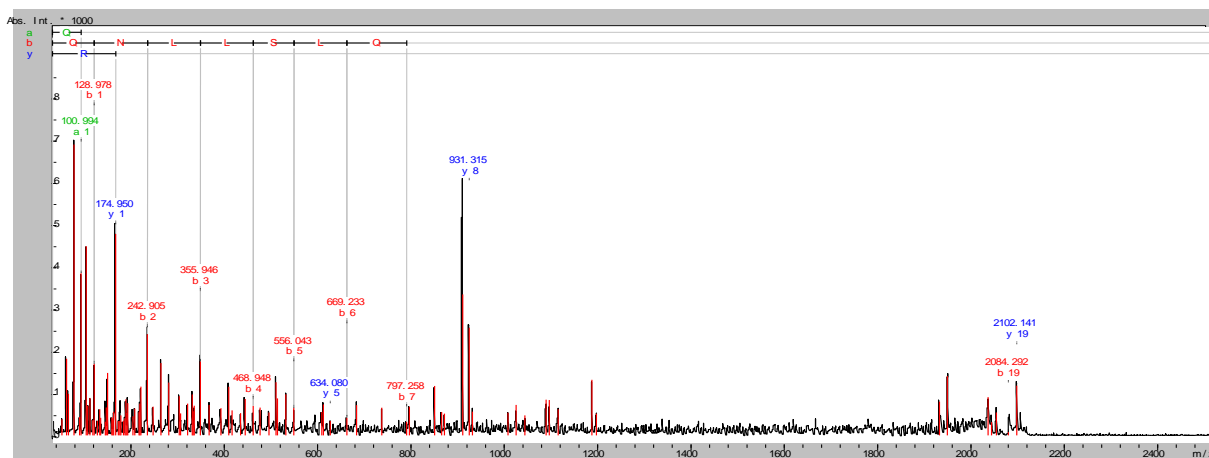

52

53 **Peak 38**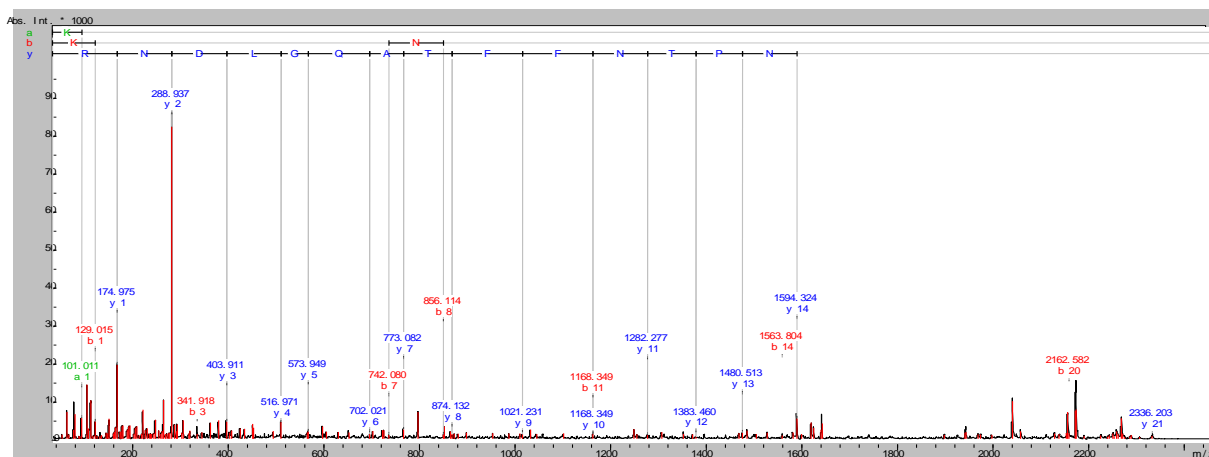

54

55 **637373432 NP\_772484:**56 **Peak 5**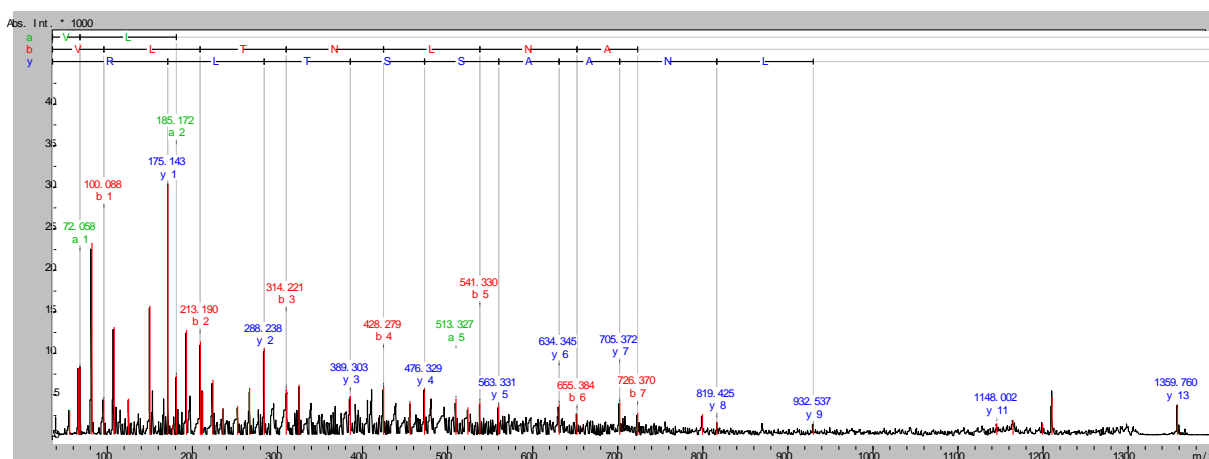

57

58

Figure S1

## 59 Peak 14

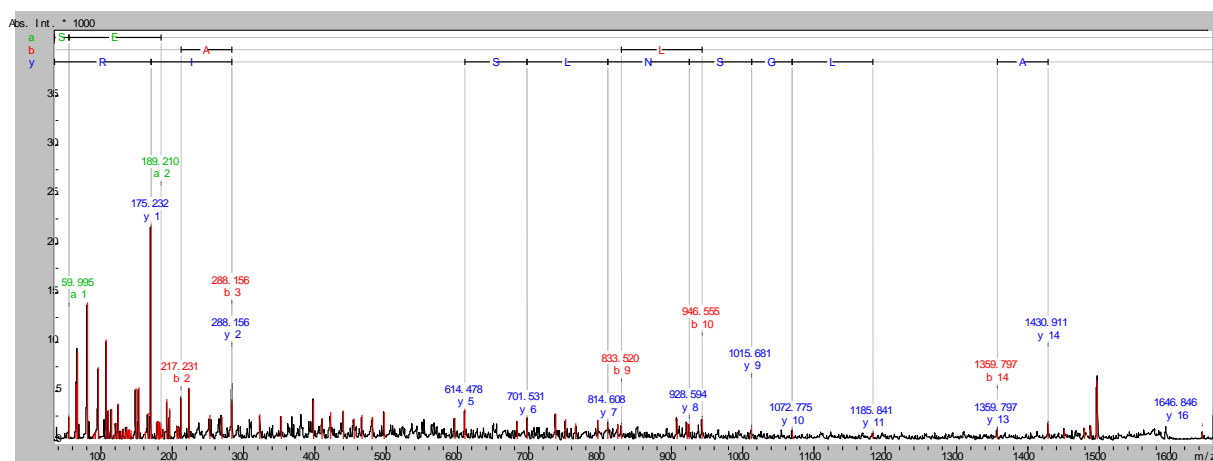

60

61

## 62 Peak 22

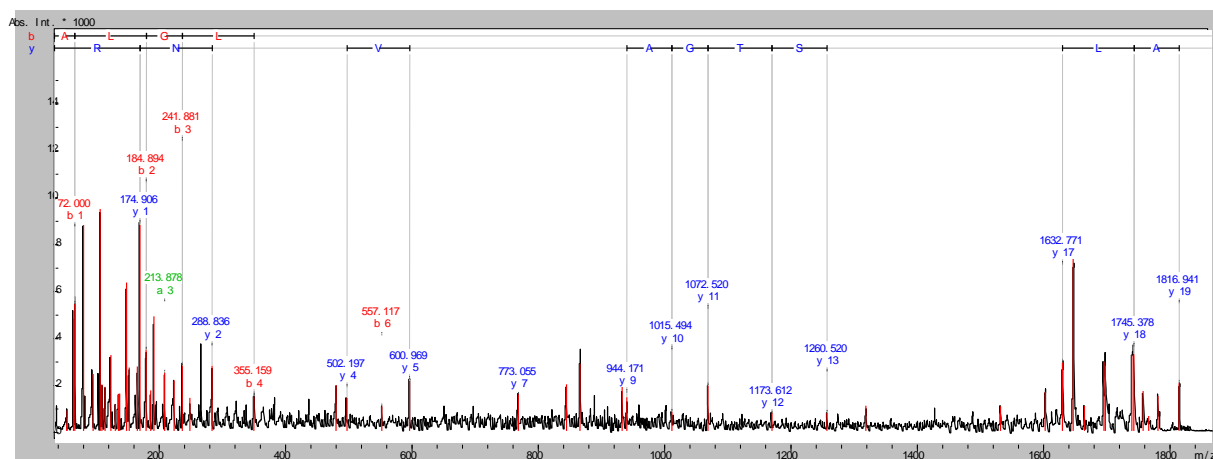

63

64 **637373433 NP\_772485:**

## 65 Peak 15

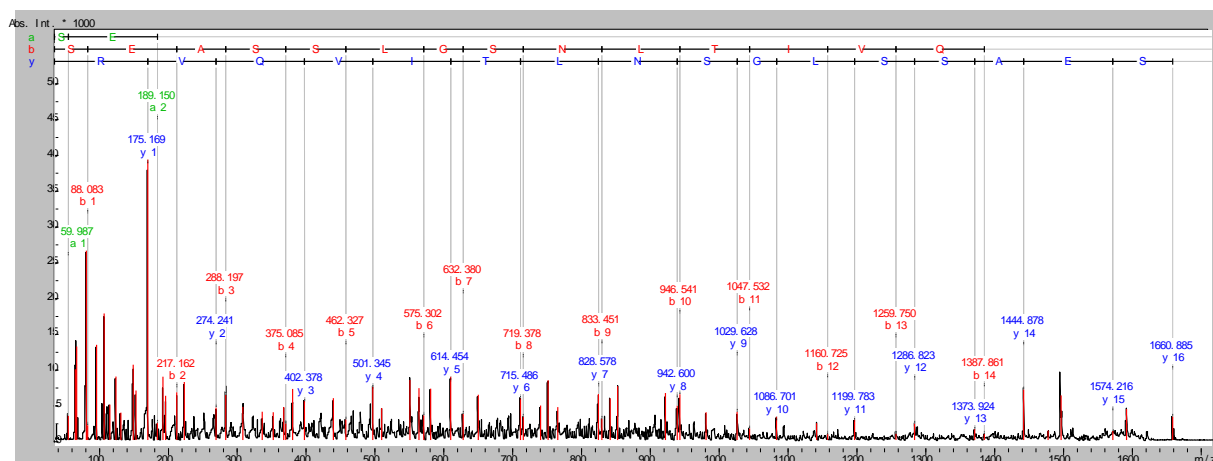

66

67

Figure S1 (cont.)

## 68 Peak 25

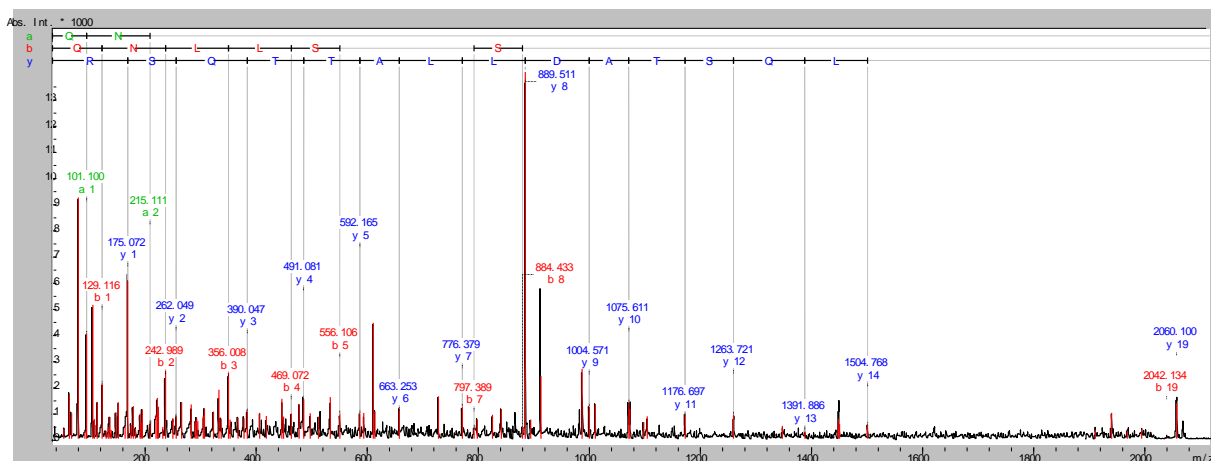

69

## 70 Peak 35

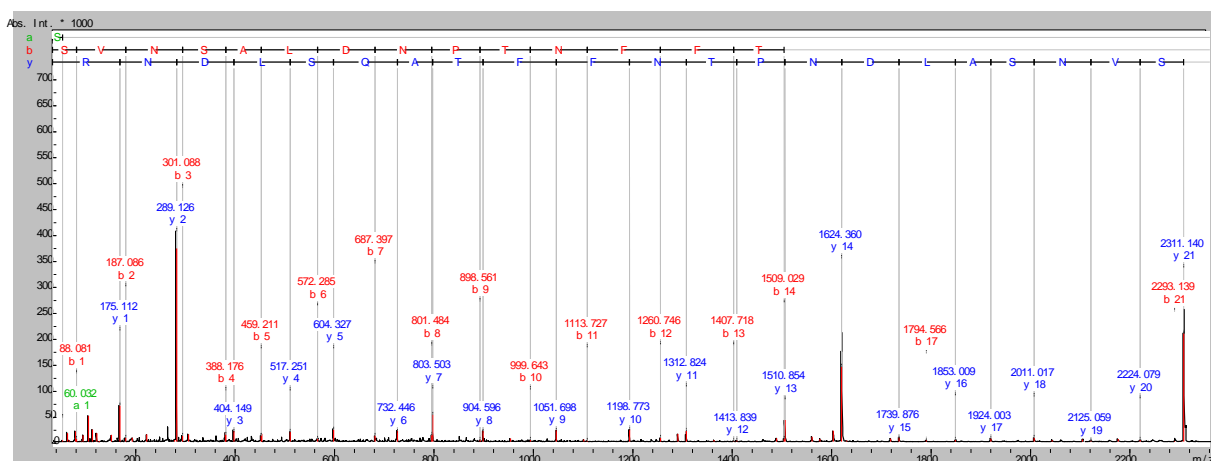

71

72

## 73 637373434 NP\_772486:

## 74 Peak 4

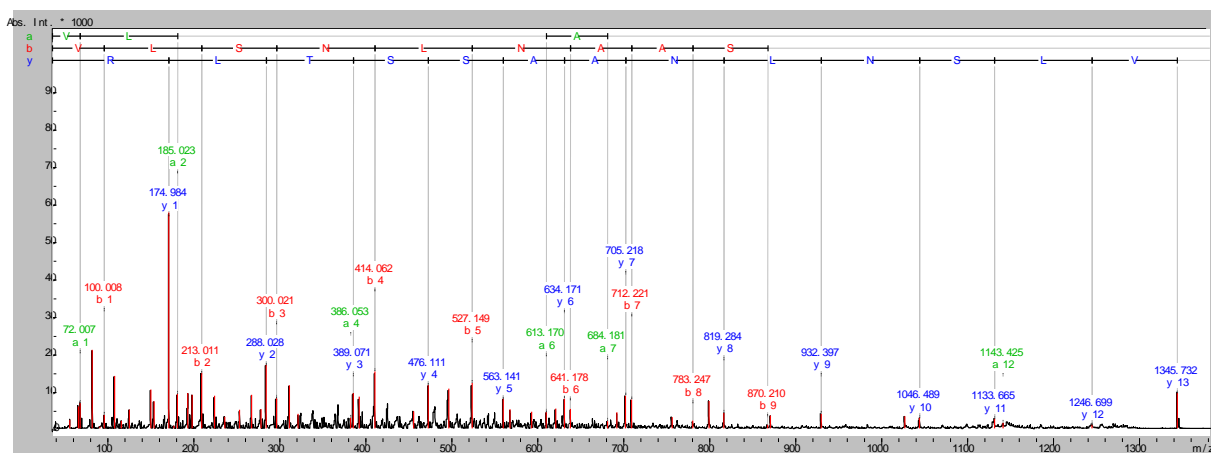

75

76

Figure S1 (cont.)

## 77 Peak 24

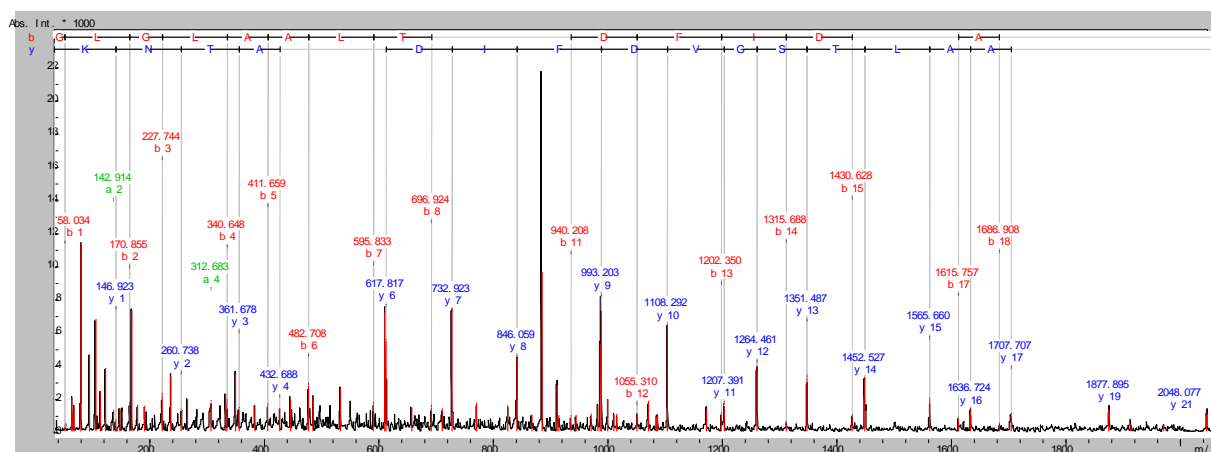

78

79 **Fig. S1.** Sequencing of the specific peptides of each flagellin by MALDI TOF-TOF MS<sup>2</sup>. Sequence assignment was performed  
 80 using Biotoools 3.2 SR4 software with a tolerance of 0.6 Da for internal fragment assignments and 0.15 Da for parental peak.  
 81 Specific peptide sequencing was used to identify each flagellin with a high confidence degree.

82

83

84 **Table S2.** Specific unique peptides from *FliC1*, *FliC2*, *FliC3* and *FliC4* sequenced by MALDI  
 85 TOF-TOF.

| Flagellins                                                                | Meas M/z | Calc MH+ | Dev.(Da) | Range     | Sequence              |
|---------------------------------------------------------------------------|----------|----------|----------|-----------|-----------------------|
| <b>FliC1</b><br>637373431 NP_772483 [B. japonicum<br>USDA 110: NC_004463] |          |          |          |           |                       |
| peak 28                                                                   | 2102,15  | 2102,11  | 0.038    | 12 - 30   | QNLLSLQSTADLLATTQER   |
| peak 38                                                                   | 2336,20  | 2336,16  | 0.041    | 36 - 56   | KVNTALDNPTNFFTAQGLDNR |
| <b>FliC2</b><br>637373432 NP_772484 [B. japonicum<br>USDA 110: NC_004463] |          |          |          |           |                       |
| peak 5                                                                    | 1359,81  | 1359,76  | 0.046    | 670 - 682 | VLTNLNAASSTLR         |
| peak 14                                                                   | 1646,95  | 1646,87  | 0.078    | 683 - 698 | SEASSLGSNLSVVQIR      |
| peak 22                                                                   | 1817,05  | 1816,95  | 0.103    | 318 - 336 | ALGLTTSTGAGNATVNVNR   |
| <b>FliC3</b><br>637373433 NP_772485 [B. japonicum<br>USDA 110: NC_004463] |          |          |          |           |                       |
| peak 15                                                                   | 1660,97  | 1660,89  | 0.082    | 683 - 698 | SEASSLGSNLTIVQVR      |
| peak 25                                                                   | 2060,14  | 2060,10  | 0.042    | 12 - 30   | QNLLSLQSTADLLATTQSR   |
| peak 35                                                                   | 2311,14  | 2311,10  | 0.041    | 36 - 56   | SVNSALDNPTNFFTAQSLDNR |
| <b>FliC4</b><br>637373434 NP_772486 [B. japonicum<br>USDA 110: NC_004463] |          |          |          |           |                       |
| peak 4                                                                    | 1345,79  | 1345,74  | 0.049    | 670 - 682 | VLSNLNAASSTLR         |
| peak 24                                                                   | 2048,12  | 2048,07  | 0.054    | 649 - 669 | GLGLAALTSGVDFIDNAATNK |

86

87



88 **Some trajectories are difficult to classify.** The complexity of the trajectories observed in  
 89 this work prevented us to classify them without a quantitative criterion. Examples of  
 90 trajectories that contained different features and could not be unambiguously classified are  
 91 presented in Supplementary Fig. S2.

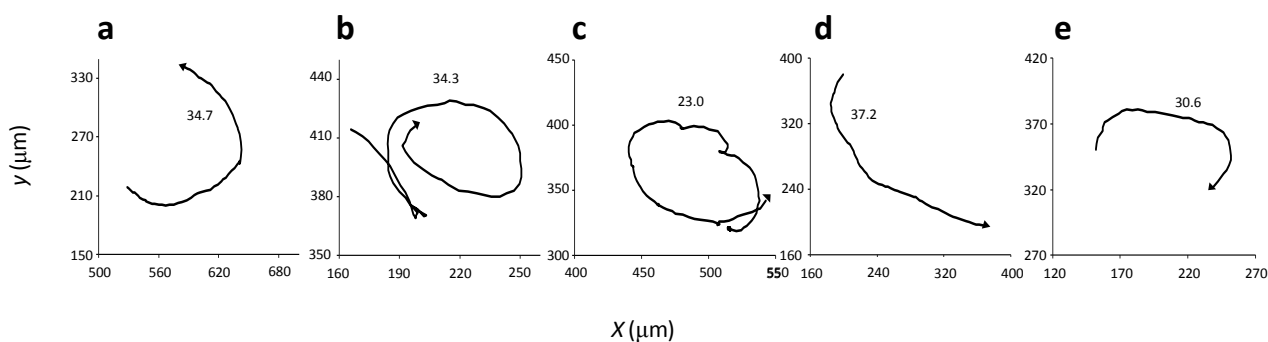

92

93 **Fig. S2.** Examples of trajectories difficult to classify in the classes defined in the main article: curved (a), linear with RR  
 94 changes in direction and then circular (b); circular with an RRF change in direction (c); wide open curve (d); curved with a  
 95 linear stretch in the middle (e). Coordinate axis values correspond to those of Fig. 2a-d in the main text. The numbers next  
 96 to the trajectories indicate the mean speeds in micrometers per second ( $\mu\text{m}\cdot\text{s}^{-1}$ ).

97

98 **Values of Trajectory Index (*TRAIN*) for the trajectories shown in the main article.** To  
 99 better illustrate how *TRAIN* was calculated, we present in Supplementary Table S3 the  
 100 values of all the variables that gave rise to *TRAIN* in the trajectories shown in Figs. 2, 4 and  
 101 S2. In this way, the reader may contrast the numerical values of *NGDR*, *s*,  $\langle \cos\alpha \rangle$  and *c*  
 102 against the trajectories to appreciate the extent to which *TRAIN* represents their shapes.

103

104

**Table S3. TRAIN calculation of the trajectories exemplified in this work\***

| Trajectory            | TRAIN variables |          |                              |          | TRAIN             |
|-----------------------|-----------------|----------|------------------------------|----------|-------------------|
|                       | NGDR            | <i>s</i> | $\langle \cos\alpha \rangle$ | <i>c</i> |                   |
| Circular (2e)         | 0.13            | 1.18     | 0.95                         | 0        | 1.09              |
| Circular (4a)         | 0.12            | 0.77     | 0.98                         | 0        | 1.19              |
| Linear (2f)           | 0.97            | 0.34     | 0.95                         | 0        | 1.99              |
| RRF (2h)              | 0.20            | 1.91     | 0.89                         | 5        | 0.60              |
| RRF (4d)              | 0.13            | 4.56     | 0.80                         | 7        | 0.21              |
| RRF (4g)              | 0.60            | 2.78     | 0.90                         | 2        | 1.06              |
| RR (2g)               | 0.55            | 6.17     | 0.86                         | 7        | 0.36              |
| Rough (2i)            | 0.54            | 1.25     | 0.23                         | 29       | 0.46              |
| Diffusive (2j)        | 0.12            | 6.14     | 0.32                         | 49       | $2 \cdot 10^{-6}$ |
| Curved (S2a)          | 0.51            | 0.72     | 0.98                         | 0        | 1.62              |
| Circular/RR (S2b)     | 0.10            | 3.80     | 0.92                         | 3        | 0.78              |
| Circular/RRF (S2c)    | 0.11            | 4.17     | 0.91                         | 3        | 0.76              |
| Wide open curve (S2d) | 0.85            | 0.34     | 0.98                         | 0        | 1.94              |
| Curved/linear (S2e)   | 0.56            | 0.91     | 0.97                         | 0        | 1.59              |

105

$$*TRAIN = NGDR^s + \langle \cos\alpha \rangle^c$$

106

107 **More images of  $\Delta$ lafA cells from soft agar plates with viscosity at 80 mPa s.** These  
 108 transmission electron micrographs show the reproducibility of the flagellar sizes and  
 109 disposition with respect to the cell body.

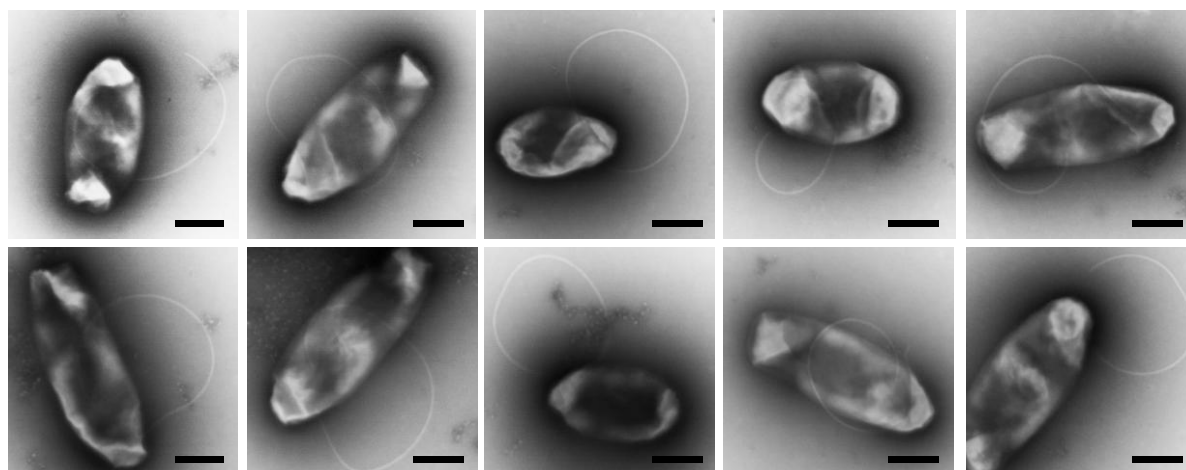

110

111 **Fig. S3.** Ten  $\Delta$ lafA cells with short and curved subpolar flagella, often surrounding the cell body (scale bar: 0.5  $\mu$ m).

112 **References**

- 113 60. Watt, S. A., Patschkowski, T., Kalinowski, J. & Niehaus, K. Qualitative and quantitative  
114 proteomics by two-dimensional gel electrophoresis, peptide mass fingerprint and a  
115 chemically-coded affinity tag (CCAT). *J. Biotechnol.* **106**, 287-300;  
116 DOI:10.1016/j.jbiotec.2003.07.014 (2003)

117
